# Supplementary material
Source: Springer Nature journal article supplement (https://www.springermedizin.de/resource/supplementary/12891_2009_966_MOESM6_ESM.pdf/9506812)

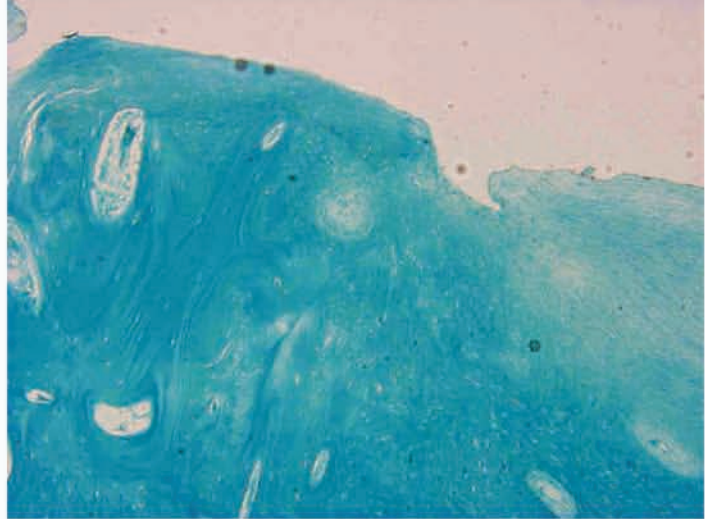

a

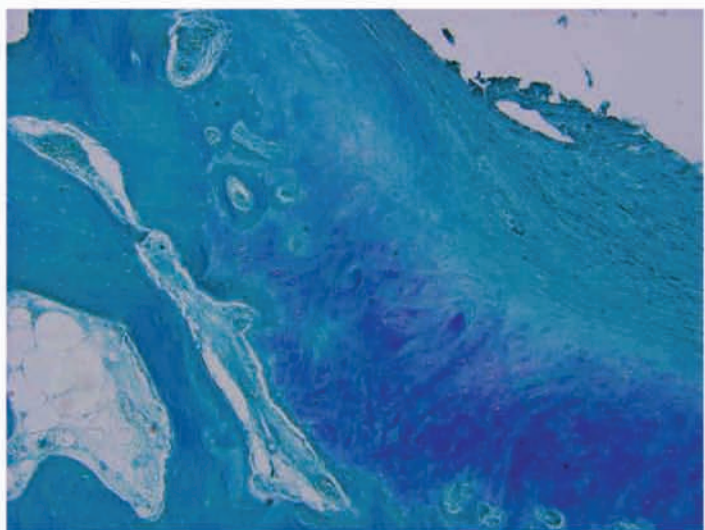

b

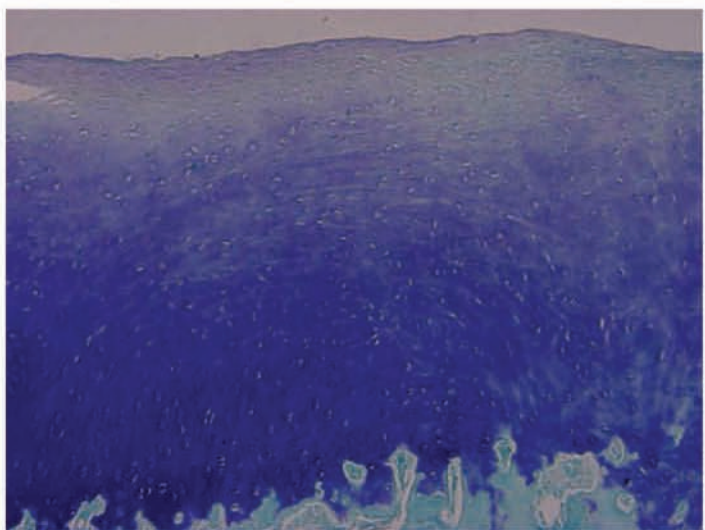

c

Supplement: MOESM6 [file 9506812]
